# Supplementary material for: Frequent Lucid Dreaming Is Associated with Meditation Practice Styles, Meta-Awareness, and Trait Mindfulness
Source: MDPI journal article supplement (doi:10.3390/brainsci14050496), 2024-05-14
Supplement: s1 [file s1]

## Supplementary Material

Table S1

Descriptive statistics of RMMtm items and factor loading matrix using principal components analysis (Oblimin rotation).

| RMMtm Item                        | Mean (SD)   | Factor 1:<br>Mindful<br>Relaxation<br>and Focus | Factor 2:<br>Mindful<br>Transcendence |
|-----------------------------------|-------------|-------------------------------------------------|---------------------------------------|
| RMM 1: Relaxed Muscles            | 4.59 (1.83) | .792                                            |                                       |
| RMM 2: Relaxed Breath             | 5.10 (1.74) | .793                                            |                                       |
| RMM 3: Ease and Peace             | 4.80 (1.69) | .928                                            |                                       |
| RMM 4: Feeling Refreshed          | 4.53 (1.63) | .879                                            |                                       |
| RMM 5: Pleasant Mind<br>Wandering | 4.71 (1.87) | .727                                            |                                       |
| RMM 6: Centered, Grounded         | 4.59 (1.74) | .839                                            |                                       |
| RMM 7: Quiet and Present          | 4.21 (1.81) | .742                                            |                                       |
| RMM 8: Accepting                  | 4.48 (1.82) | .798                                            |                                       |
| RMM 9: Letting Go                 | 4.53 (1.83) | .739                                            |                                       |
| RMM 10: Effortless                | 4.15 (1.83) | .780                                            |                                       |
| RMM 11: Present Moment            | 4.69 (1.68) | .848                                            |                                       |
| RMM 12: Calm Observer             | 4.24 (1.89) | .670                                            |                                       |
| RMM 13: Focused, Clear,<br>Aware  | 4.22 (1.77) | .641                                            |                                       |
| RMM 14: Curios, Fascinated        | 5.01 (1.74) | .580                                            |                                       |
| RMM 15: Vivid Experience          | 3.87 (1.88) | .454                                            | .396                                  |
| RMM 16: Purposeful                | 4.22 (1.95) | .538                                            |                                       |
| RMM 17: Motivated                 | 4.34 (1.74) | .791                                            |                                       |
| RMM 18: Ready for the Day         | 4.46 (1.72) | .795                                            |                                       |
| RMM 19: Creative and Inspired     | 4.55 (1.62) | .684                                            |                                       |
| RMM 20: Focus on One Thing        | 4.60 (1.78) | .817                                            |                                       |
| RMM 21: Optimistic                | 4.91 (1.70) | .800                                            |                                       |

|                                             |             |        |       |
|---------------------------------------------|-------------|--------|-------|
| RMM 22: Compassion                          | 4.77 (1.73) | .599   |       |
| RMM 23: Thankful                            | 5.01 (1.75) | .548   |       |
| RMM 24: Awe and Wonder                      | 4.46 (1.77) | .484   | .359  |
| RMM 25: Prayerful                           | 3.11 (2.05) |        | .749  |
| RMM 26: Something Greater                   | 3.46 (2.10) |        | .832  |
| RMM 27: Concerns seemed Small               | 3.92 (1.91) |        | .602  |
| RMM 28: Timeless, Boundless, Infinite       | 3.45 (2.02) |        | .789  |
| RMM 29: Connected with Everything           | 3.26 (1.93) |        | .784  |
| RMM 30: Deeper Truth                        | 3.17 (2.02) |        | .853  |
| RMM 31: Experience Beyond Words             | 2.47 (1.78) |        | .853  |
| RMM 32: Profound Mystery                    | 2.85 (1.93) |        | .873  |
| Eigenvalue                                  |             | 12.856 | 5.848 |
| Percentage of Explained Variance            |             | 0.402  | 0.183 |
| Cumulative Percentage of Explained Variance |             | 0.402  | 0.584 |

---

Note:  $n = 291$ .

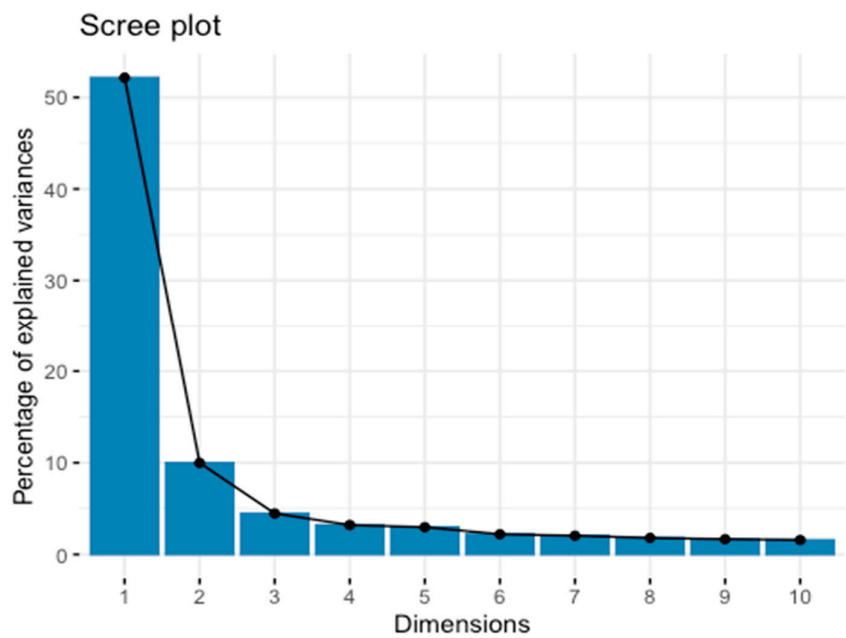

Figure S1 Scree plot of PCA result, indicating two factors.

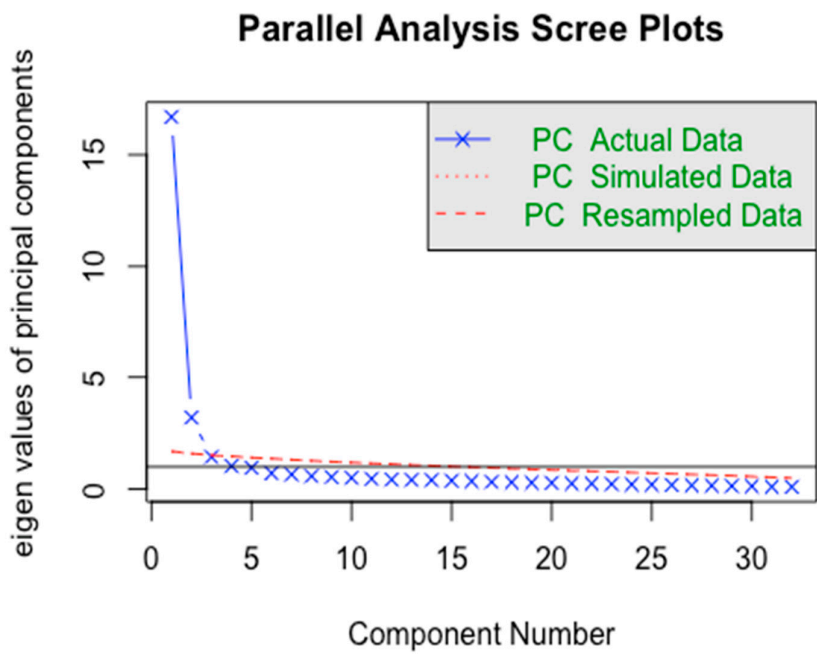

Figure S1 Parallel analysis plot of PCA, indicating two factors.
